# Supplementary material
Source: publisher figshare collection journal article supplement (https://karger.figshare.com/articles/dataset/_/4558075)

**BamHI**  
iLp84 iLp1308

**M**  
iLp84 iLp1308

**BglII**  
iLp84 iLp1308

**M**  
iLp84 iLp1308

**EcoRV**  
iLp84 iLp1308

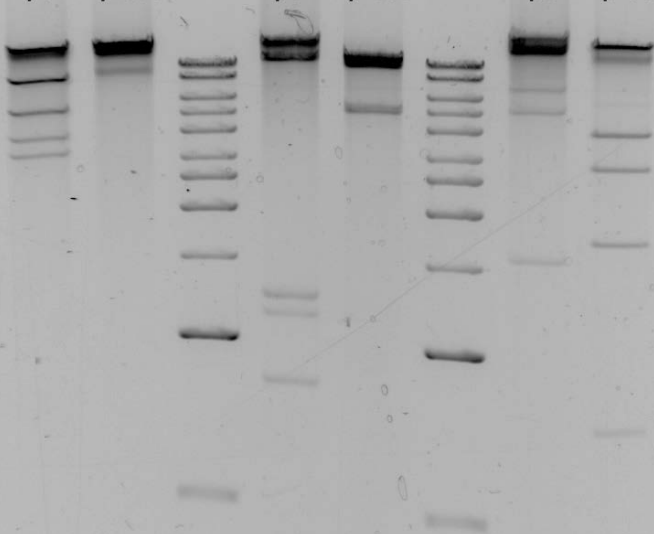

Supplement: Supplementary file 1 [file 1]

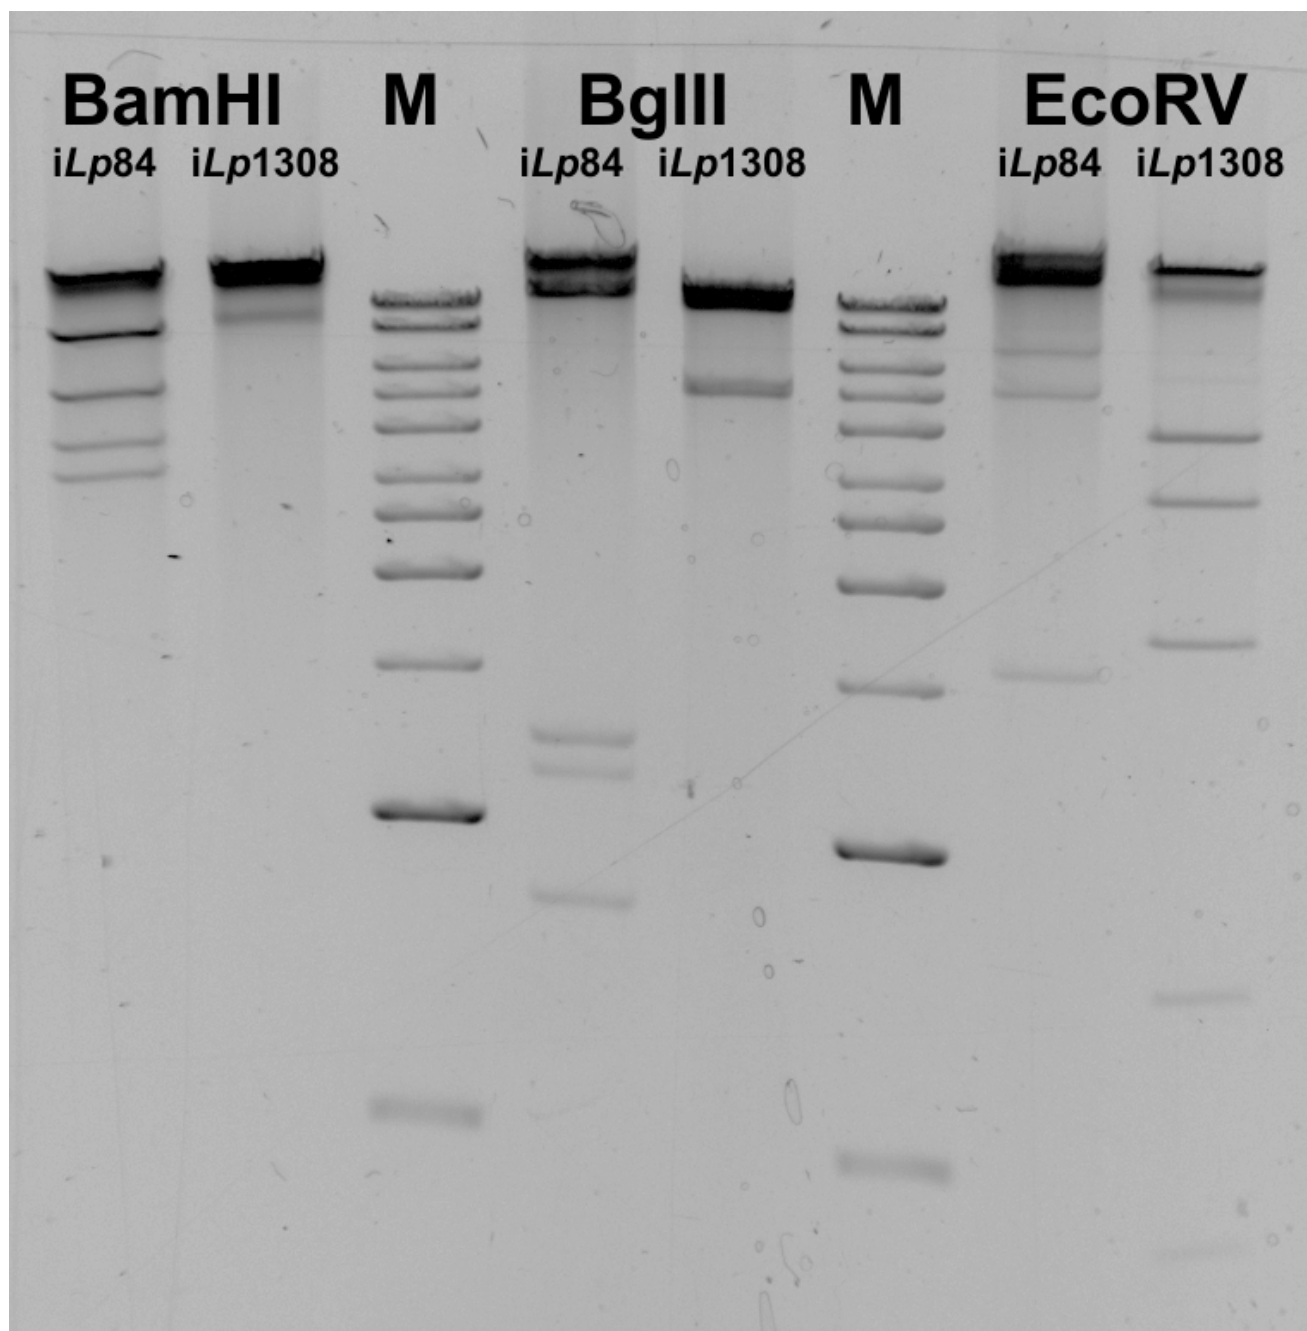

Supplement: Supplementary file 2 [file 1]
